# Supplementary material
Source: publisher figshare collection journal article supplement (https://acs.figshare.com/ndownloader/files/4015162)
Supplement: Supplementary file 1 [file 4015162]

# **Supporting Information for**

## **Controlling Vibrational Energy Flow in Liquid Alkylbenzenes**

Brandt C. Pein, Yuxiao Sun and Dana D. Klott

*School of Chemical Sciences, University of Illinois at Urbana-Champaign*

### **Contents:**

Normal mode illustrations (Figures S1a-c)

Frequency assignments (Table S1)

Time-dependent IR-Raman data for isopropylbenzene (IPB) and t-butyl benzene (TBB) (Figures S2 and S3)

References S1-S7

### **Normal Modes and Mode Classification**

We computed the normal modes using MP2 perturbation theory with 6-31G as the basis, using the Gaussian 09 computational package, and compared the results with previous assignments<sup>S1-S5</sup>. The results are shown in table S1, where the Raman-active transitions are assigned and the transitions too weak to observe via transient anti-Stokes spectroscopy are numbered. Figure S1 shows each of the normal modes, which were divided into three sets, substituent modes, phenyl modes or global modes. The mode classifications were made based on their Potential Energy Distributions (PED) computed using the VEDA-4 software package.<sup>S6</sup> The software carries out Vibrational Energy Distribution Analysis (VEDA) to determine PED's for the computed normal mode vectors. A wonderful review of this method can be found online.<sup>S7</sup> As a summary, the VEDA method transforms the Cartesian normal mode vectors into a new basis of internal 2,3 and 4 body coordinates. The contribution of each internal coordinate basis to the total potential

energy of each mode is decomposed to give their PED distribution. Modes with 80% or more of their potential energy contributed by phenyl or substituent localized were coordinates classified as phenyl or substituent. If there was less than 80% in either phenyl or substituent localized coordinates or if there was 80% or more in global coordinates the mode was classified as global. Note that the PED for a given mode doesn't add up to 100 since there are small <1% contributions from some coordinates that are not considered.

Figures S2 and S3 show IR-Raman spectra with substituent and phenyl pumping for IPB and TBB.

#### Literature cited

- (S1) Fishman, A. I.; Noskov, A. I.; Remizov, A. B.; Chachkov, D. V., Vibrational Spectra and Structure of Isopropylbenzene. *Spectrochim Acta A* **2008**, *71* (3), 1128-1133.
- (S2) Yamakita, Y.; Isogai, Y.; Ohno, K., Large Raman-Scattering Activities for the Low-Frequency Modes of Substituted Benzenes: Induced Polarizability and Stereo-Specific Ring-Substituent Interactions. *J Chem Phys* **2006**, *124* (10).
- (S3) Morrison, V. J.; Laposa, J. D., Luminescence of Toluene and Deuterium-Substituted Toluenes at 77degreesk in Polycrystalline Methylcyclohexane. *Spectrochim Acta A* **1976**, *32* (3), 443-454.
- (S4) Callegari, A.; Merker, U.; Engels, P.; Srivastava, H. K.; Lehmann, K. K.; Scoles, G., Intramolecular Vibrational Redistribution in Aromatic Molecules. I. Eigenstate Resolved Ch Stretch First Overtone Spectra of Benzene. *J Chem Phys* **2000**, *113* (23), 10583-10596.
- (S5) Varsányi, G. R.; Láng, L., *Assignments for Vibrational Spectra of Seven Hundred Benzene Derivatives*. Wiley: New York, **1974**.
- (S6) Jamroz, M. H., Vibrational Energy Distribution Analysis VEDA 4, *Warsaw* **2004-2010**
- (S7) Jamroz, M. H., Vibrational energy distribution analysis (VEDA): Scopes and limitations, *Spectrochim Acta A* **2013**, *114*, 220-230.

(a)

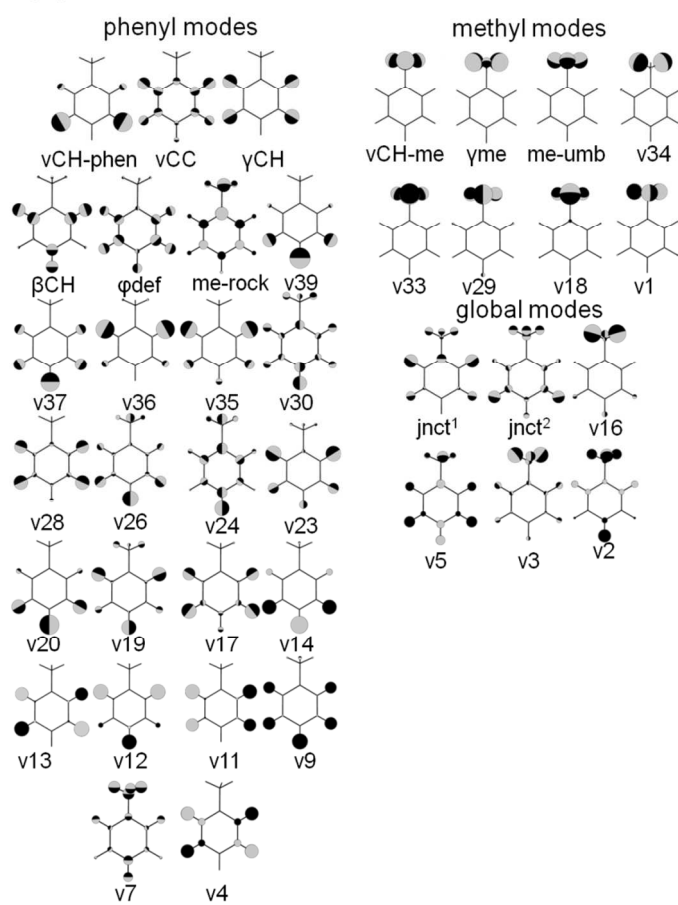

(b)

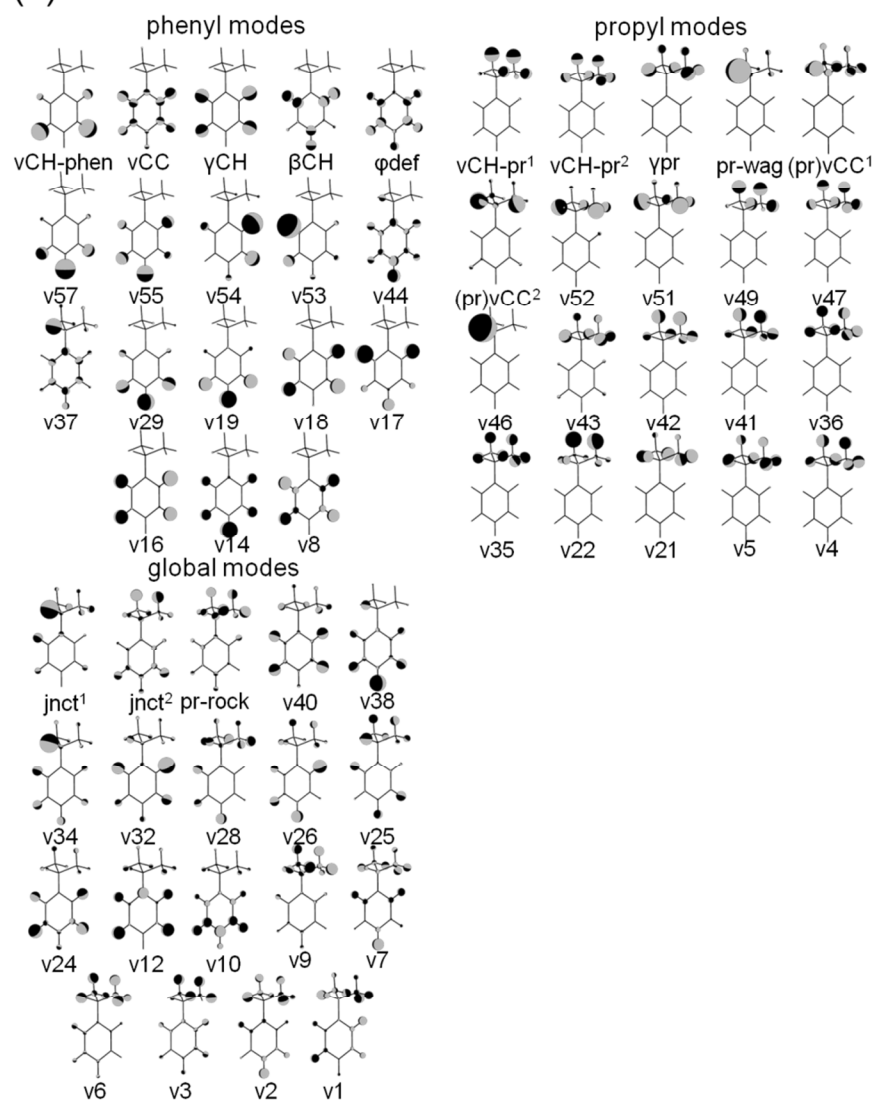

(c)

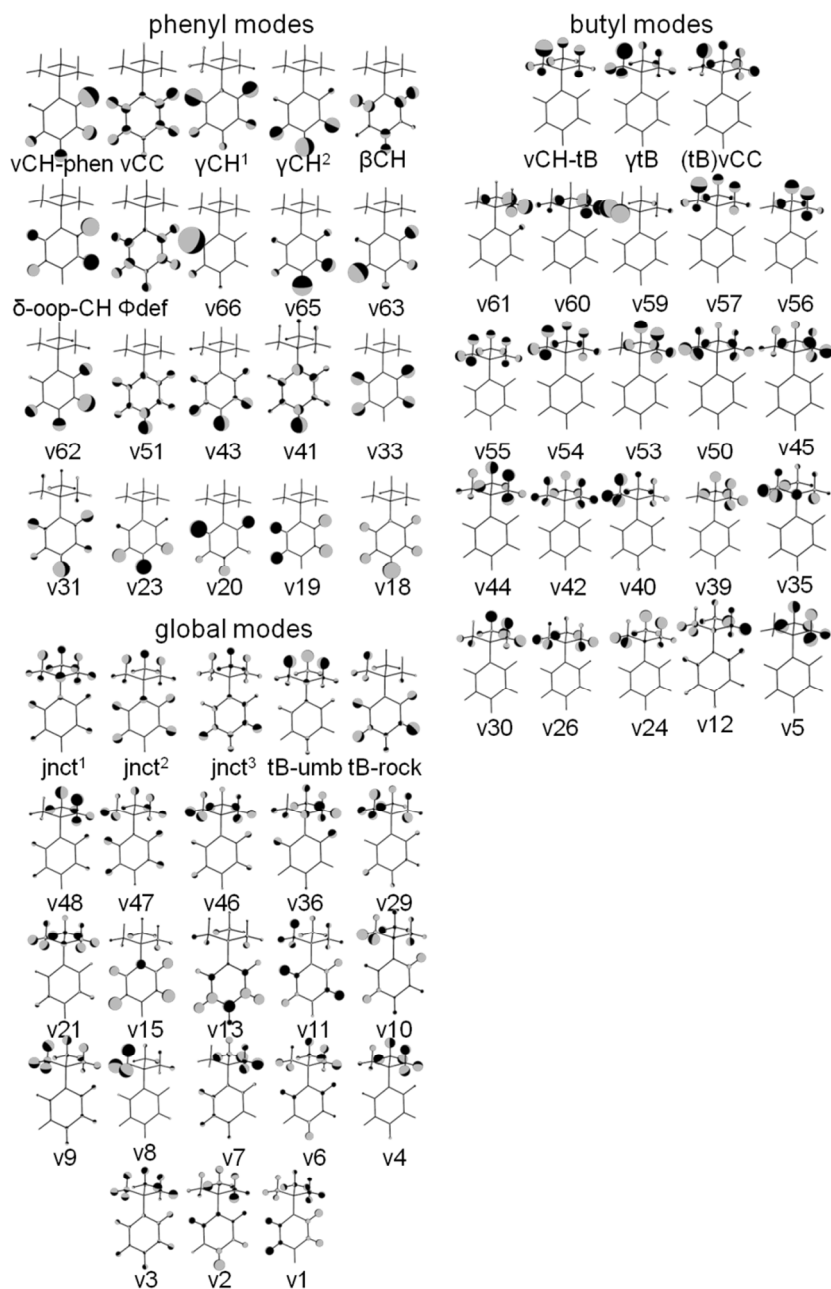

**Figure S1** Classified normal modes of (a)toluene, (b) isopropylbenzene (IPB) and (c) tertbutylbenzene (TBB) computed using MP2 perturbation theory with the 6-31G basis set. Relative sphere size indicates relative displacement while the grey and white fill represents the displacement direction.

toluene vibrational frequencies

| mode                    | MP2     | experimental | PED(%)                         | classification |
|-------------------------|---------|--------------|--------------------------------|----------------|
| v39                     | 3059.16 |              | phenyl(97)                     | phenyl         |
| vCH-phen (v38)          | 3047.70 | 3055         | phenyl(96)                     | phenyl         |
| v37                     | 3039.88 |              | phenyl(96)                     | phenyl         |
| v36                     | 3026.63 |              | phenyl(91)                     | phenyl         |
| v35                     | 3025.26 |              | phenyl(97)                     | phenyl         |
| v34                     | 3011.92 |              | subs.(98)                      | subs.          |
| v33                     | 2996.39 |              | subs.(97)                      | subs.          |
| vCH-me (v32)            | 2920.94 | 2920         | subs.(97)                      | subs.          |
| vCC (v31)               | 1588.04 | 1600         | phenyl(96)                     | phenyl         |
| v30                     | 1567.12 |              | phenyl(83) global(8) subs.(4)  | phenyl         |
| v29                     | 1470.11 |              | subs.(89)                      | subs.          |
| v28                     | 1469.46 |              | phenyl(80) global(20)          | phenyl         |
| γme (v27)               | 1459.92 | 1440         | subs.(99)                      | subs.          |
| v26                     | 1419.57 |              | phenyl(83) subs.(7)            | phenyl         |
| me-umb (v25)            | 1384.31 | 1380         | subs.(94)                      | subs.          |
| v24                     | 1379.60 |              | phenyl(92) subs.(4)            | phenyl         |
| v23                     | 1290.49 |              | phenyl(92)                     | phenyl         |
| jnct <sup>1</sup> (v22) | 1192.21 | 1205         | global(66) phenyl(26) subs.(4) | global         |
| γCH (v21)               | 1164.36 | 1175         | phenyl(97)                     | phenyl         |
| v20                     | 1145.28 |              | phenyl(96)                     | phenyl         |
| v19                     | 1073.25 |              | phenyl(81) subs.(11)           | phenyl         |
| v18                     | 1021.20 |              | subs.(94)                      | subs.          |
| v17                     | 1009.19 |              | phenyl(93)                     | phenyl         |
| v16                     | 970.10  |              | subs.(77) phenyl(21)           | global         |
| βCH(v15)                | 965.68  | 1005         | phenyl(81) global(19)          | phenyl         |
| v14                     | 836.85  |              | phenyl(91) global(6)           | phenyl         |
| v13                     | 833.41  |              | phenyl(95)                     | phenyl         |
| v12                     | 810.75  |              | phenyl(94)                     | phenyl         |
| v11                     | 787.48  |              | phenyl(99)                     | phenyl         |
| jnct <sup>2</sup> (v10) | 763.72  | 795          | global(65) phenyl(26)          | global         |
| v9                      | 682.18  |              | phenyl(92)                     | phenyl         |
| φdef (v8)               | 599.74  | 608          | phenyl(92)                     | phenyl         |
| v7                      | 498.57  |              | phenyl(82) global(18)          | phenyl         |
| me-rock (v6)            | 474.95  | 510          | phenyl(82) global(13)          | phenyl         |
| v5                      | 425.74  |              | global(82) phenyl(15)          | global         |
| v4                      | 375.75  |              | phenyl(90) global(7)           | phenyl         |
| v3                      | 324.79  |              | global(88) phenyl(4)           | global         |
| v2                      | 195.11  |              | global(75) phenyl(16)          | global         |
| v1                      | 56.6    |              | subs.(99)                      | subs.          |

isopropylbenzene (IPB) vibrational frequencies

| mode                      | MP2     | experimental | PED(%)                          | classification |
|---------------------------|---------|--------------|---------------------------------|----------------|
| v57                       | 3071.97 |              | phenyl(95)                      | phenyl         |
| vCH-phen (v56)            | 3060.52 | 3060         | phenyl(100)                     | phenyl         |
| v55                       | 3053.25 |              | phenyl(100)                     | phenyl         |
| v54                       | 3042.81 |              | phenyl(99)                      | phenyl         |
| v53                       | 3037.59 |              | phenyl(100)                     | phenyl         |
| v52                       | 3025.02 |              | subs.(96)                       | subs.          |
| v51                       | 3023.93 |              | subs.(99)                       | subs.          |
| vCH-pr <sup>1</sup> (v50) | 3016.39 | 3000         | subs.(99)                       | subs.          |
| v49                       | 3013.09 |              | subs.(99)                       | subs.          |
| vCH-pr <sup>2</sup> (v48) | 2933.1  | 2930         | subs.(99)                       | subs.          |
| v47                       | 2931.38 |              | subs.(99)                       | subs.          |
| v46                       | 2919.41 |              | subs.(99)                       | subs.          |
| vCC (v45)                 | 1590.16 | 1620         | phenyl(83) global(9)            | phenyl         |
| v44                       | 1570.78 |              | phenyl(87) global(9)            | phenyl         |
| v43                       | 1487.58 |              | subs.(82) global(11)            | subs.          |
| v42                       | 1482.32 |              | subs.(87) global(4)             | subs.          |
| v41                       | 1471.86 |              | subs.(91) global(4)             | subs.          |
| v40                       | 1470.66 |              | global(76) phenyl(19)           | global         |
| γpr (v39)                 | 1466.01 | 1480         | subs.(92) global(2)             | subs.          |
| v38                       | 1431.36 |              | global(47) phenyl(44)           | global         |
| v37                       | 1395.51 |              | phenyl(80) global(8) subs.(2)   | phenyl         |
| v36                       | 1393.75 |              | subs.(95)                       | subs.          |
| v35                       | 1374.92 |              | subs.(93) global(2)             | subs.          |
| v34                       | 1333.27 |              | global(75) phenyl(14) subs.(4)  | global         |
| pr-wag (v33)              | 1316.56 | 1330         | subs.(90)                       | subs.          |
| v32                       | 1282.84 |              | phenyl(70) global(21) subs.(2)  | global         |
| jnct <sup>1</sup> (v31)   | 1205.33 | 1225         | global(64) subs.(15) phenyl(13) | global         |
| γCH (v30)                 | 1170.37 | 1170         | phenyl(95)                      | phenyl         |
| v29                       | 1150.91 |              | phenyl(87) global(3)            | phenyl         |



isopropylbenzene (IPB) vibrational frequencies (cont.)

| mode                       | MP2     | experimental | PED(%)                         | classification |
|----------------------------|---------|--------------|--------------------------------|----------------|
| v28                        | 1145.42 |              | global(71) phenyl(12) subs.(7) | global         |
| (pr)vCC <sup>1</sup> (v27) | 1109.95 | 1110         | subs.(81) global(10)           | subs.          |
| v26                        | 1074.92 |              | global(58) phenyl(30) subs.(3) | global         |
| v25                        | 1039.03 |              | global(69) phenyl(19) subs.(5) | global         |
| v24                        | 1010.31 |              | phenyl(64) global(26) subs.(4) | global         |
| βCH (v23)                  | 968.73  | 1025         | phenyl(85) global(10)          | phenyl         |
| v22                        | 947.37  |              | subs.(95)                      | subs.          |
| v21                        | 905.97  |              | subs.(83) global(9)            | subs.          |
| (pr)vCC <sup>2</sup> (v20) | 884.82  | 920          | subs.(81) global(19)           | subs.          |
| v19                        | 843.45  |              | phenyl(93)                     | phenyl         |
| v18                        | 838.16  |              | phenyl(97)                     | phenyl         |
| v17                        | 821.61  |              | phenyl(94)                     | phenyl         |
| v16                        | 790.69  |              | phenyl(95)                     | phenyl         |
| jnct <sup>2</sup> (v15)    | 725.07  | 776          | global(78) phenyl(14)          | global         |
| v14                        | 703.22  |              | phenyl(88) global(3)           | phenyl         |
| φdef (v13)                 | 600.48  | 660          | phenyl(92)                     | phenyl         |
| v12                        | 569.73  |              | phenyl(51) global(33) subs.(7) | global         |
| pr-rock(v11)               | 541.63  | 590          | global(84) phenyl(7)           | global         |
| v10                        | 459.57  |              | global(94)                     | global         |
| v9                         | 447.16  |              | global(86) subs.(5)            | global         |
| v8                         | 377.42  |              | phenyl(97)                     | phenyl         |
| v7                         | 299.09  |              | global(45) phenyl(43) subs.(4) | global         |
| v6                         | 294.62  |              | global(85) phenyl(2)           | global         |
| v5                         | 264.1   |              | subs.(94)                      | subs.          |
| v4                         | 237.91  |              | global(96)                     | subs.          |
| v3                         | 207.22  |              | global(89) phenyl(5)           | global         |
| v2                         | 120.51  |              | global(93)                     | global         |
| v1                         | 41.33   |              | global(93)                     | global         |

tertbutylbenzene (TBB) vibrational frequencies

| mode                    | MP2     | experimental | PED(%)                          | classification |
|-------------------------|---------|--------------|---------------------------------|----------------|
| v66                     | 3081.08 |              | phenyl(98)                      | phenyl         |
| v65                     | 3067.96 |              | phenyl(99)                      | phenyl         |
| vCH-phen(v64)           | 3057.83 | 3080         | phenyl(99)                      | phenyl         |
| v63                     | 3048.49 |              | phenyl(99)                      | phenyl         |
| v62                     | 3041.67 |              | phenyl(99)                      | phenyl         |
| v61                     | 3021.31 |              | subs.(96)                       | subs.          |
| v60                     | 3020.41 |              | subs.(100)                      | subs.          |
| v59                     | 3015.63 |              | subs.(100)                      | subs.          |
| vCH-tB(v58)             | 3011.91 | 2980         | subs.(100)                      | subs.          |
| v57                     | 3006.06 |              | subs.(100)                      | subs.          |
| v56                     | 3005.94 |              | subs.(100)                      | subs.          |
| v55                     | 2928.45 |              | subs.(100)                      | subs.          |
| v54                     | 2924.12 |              | subs.(100)                      | subs.          |
| v53                     | 2924.06 |              | subs.(100)                      | subs.          |
| vCC(v52)                | 1586.48 | 1602         | phenyl(96)                      | phenyl         |
| v51                     | 1565.31 |              | phenyl(92) subs.(2)             | phenyl         |
| v50                     | 1495.93 |              | subs.(100)                      | subs.          |
| γtB(v49)                | 1483.84 | 1465         | subs.(96)                       | subs.          |
| v48                     | 1482.44 |              | subs. (76) phenyl(12) global(6) | global         |
| v47                     | 1473.14 |              | subs.(52) phenyl(43) global(2)  | global         |
| v46                     | 1464.36 |              | subs.(72) phenyl(24) global(1)  | global         |
| v45                     | 1463.18 |              | subs.(90)                       | subs.          |
| v44                     | 1460.2  |              | subs.(97)                       | subs.          |
| v43                     | 1422.99 |              | phenyl(93) subs.(7)             | phenyl         |
| v42                     | 1400.88 |              | subs.(98)                       | subs.          |
| v41                     | 1386.46 |              | phenyl(93) subs.(6)             | phenyl         |
| v40                     | 1371.13 |              | subs.(91) phenyl(7)             | subs.          |
| v39                     | 1370.85 |              | subs.(99)                       | subs.          |
| γCH <sup>1</sup> (v38)  | 1298.53 | 1274         | phenyl(90) subs.(8)             | phenyl         |
| jnct <sup>1</sup> (v37) | 1269.2  | 1204         | subs.(69) global( 22) phenyl(7) | global         |
| v36                     | 1214.78 |              | subs.(77) phenyl(19) global(1)  | global         |
| v35                     | 1213.4  |              | subs.(95) phenyl(3)             | subs.          |
| γCH <sup>2</sup> (v34)  | 1179.57 | 1180         | phenyl(96)                      | phenyl         |

tertbutylbenzene (TBB) vibrational frequencies (cont.)

| mode                    | MP2     | experimental | PED(%)                           | classification |
|-------------------------|---------|--------------|----------------------------------|----------------|
| v33                     | 1150.75 |              | phenyl(99)                       | phenyl         |
| jnct <sup>2</sup> (v32) | 1099.55 | 1122         | phenyl(45) subs.(44) global(14)  | global         |
| v31                     | 1073.92 |              | phenyl(88) subs.(9)              | phenyl         |
| v30                     | 1023.28 |              | subs.(98)                        | subs.          |
| v29                     | 1016.09 |              | subs.(78) phenyl(21)             | global         |
| tB-rock(v28)            | 1013.17 | 1040         | phenyl(78) subs.(17) global(4)   | global         |
| βCH(v27)                | 966.72  | 1010         | phenyl(95)                       | phenyl         |
| v26                     | 935.2   |              | subs.(93)                        | subs.          |
| (tB)vCC (v25)           | 928.31  | 935          | subs.(93)                        | subs.          |
| v24                     | 918.98  |              | subs.(98)                        | subs.          |
| v23                     | 842.5   |              | phenyl(95)                       | phenyl         |
| δ-oop-CH (v22)          | 841.13  | 850          | phenyl(97)                       | phenyl         |
| v21                     | 828.67  |              | subs.(62) phenyl(24) global(8)   | global         |
| v20                     | 825.69  |              | phenyl(96) global(2)             | phenyl         |
| v19                     | 789.98  |              | phenyl(96)                       | phenyl         |
| v18                     | 705.43  |              | phenyl( 91)                      | phenyl         |
| jnct <sup>3</sup> (v17) | 685.41  | 720          | phenyl( 43) subs.(31) global(21) | global         |
| Φdef(v16)               | 599.85  | 630          | phenyl(94) subs.(3)              | phenyl         |
| v15                     | 578.75  |              | subs.(52) phenyl(32) global(13)  | global         |
| tB-umb(v14)             | 514.77  | 546          | subs.(74) phenyl(16) global(7)   | global         |
| v13                     | 461.06  |              | phenyl(54) subs.(26) global(17)  | global         |
| v12                     | 445.54  |              | subs.(94) phenyl(3)              | subs.          |
| v11                     | 379.27  |              | subs.(48) phenyl(45)             | global         |
| v10                     | 374.91  |              | subs.(77) phenyl(14)             | global         |
| v9                      | 339.53  |              | phenyl(35) subs.(53) global(8)   | global         |
| v8                      | 334.09  |              | subs.(53) phenyl(43)             | global         |
| v7                      | 306.66  |              | phenyl(46) subs.(46) global(3)   | global         |
| v6                      | 306.51  |              | phenyl(71) subs.(26) global(1)   | global         |
| v5                      | 274.5   |              | subs.(92) phenyl(5) global(4)    | subs.          |
| v4                      | 235.56  |              | subs.(77) phenyl(22) global(1)   | global         |
| v3                      | 222.58  |              | subs.(78) phenyl(21)             | global         |
| v2                      | 119.93  |              | global(57) subs.(32) phenyl(6)   | global         |
| v1                      | 50.17   |              | global(96)                       | global         |

**Table S1** Vibrational frequencies and mode classifications of toluene, isopropylbenzene (IPB) and *t*-butylbenzene (TBB). The named modes are those that are visible in the experiment while others are only numbered.

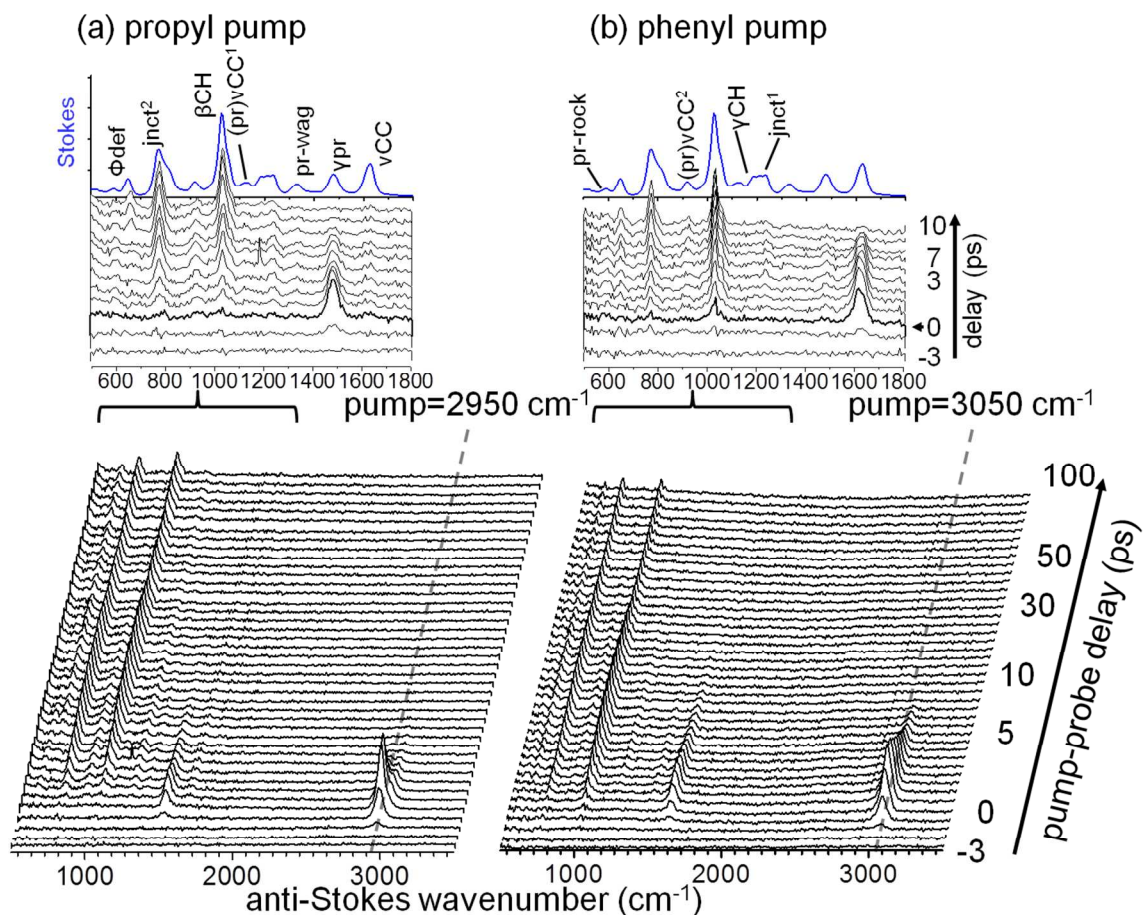

**Figure S2** Time dependent IR-Raman spectra of isopropylbenzene (IPB) using (a) propyl pump and (b) phenyl pump. The insets show the daughter excitations created during first 10 ps. The Stokes-Raman spectra are shown as a reference to see the Raman cross-sections of each transition.

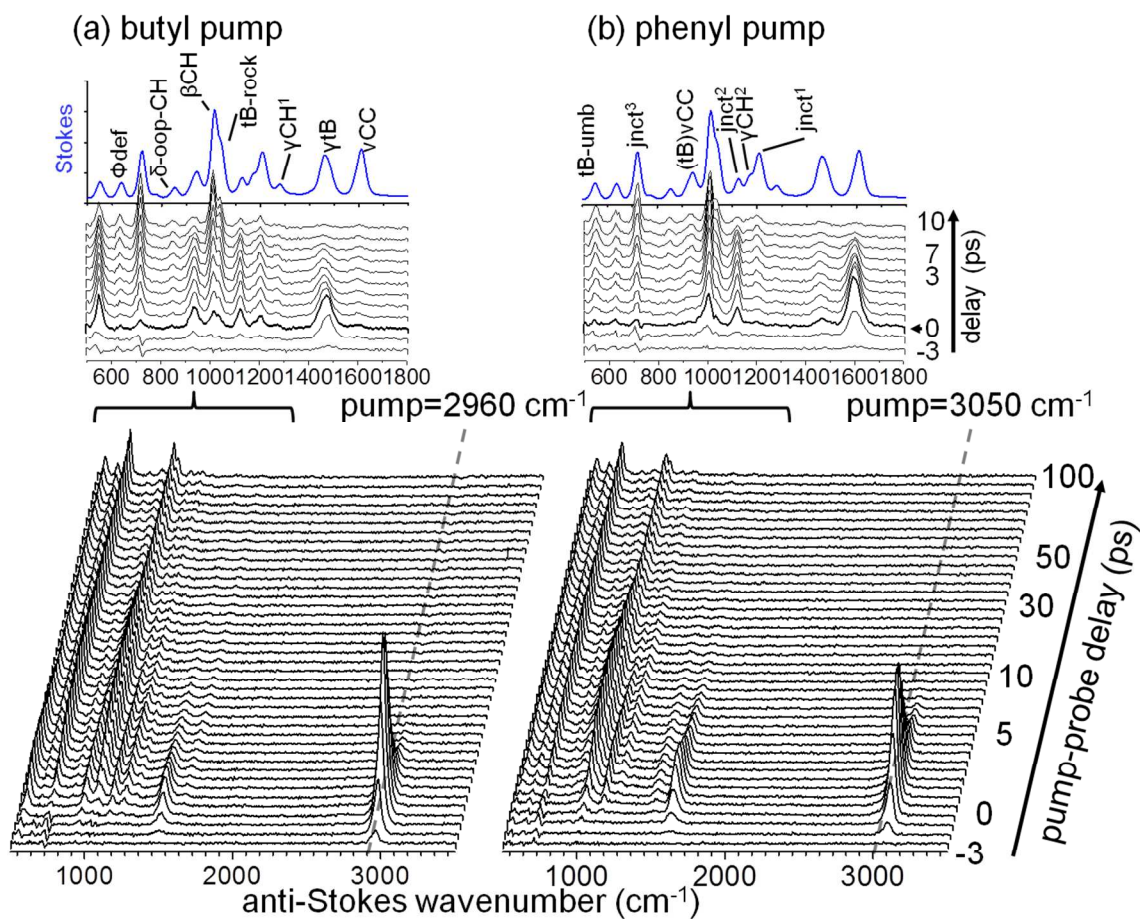

**Figure S3** Time dependent IR-Raman spectra of *t*-butylbenzene (TBB) using (a) butyl pump and (b) phenyl pump. The insets show the daughter excitations created during first 10 ps. The Stokes-Raman spectra are shown as a reference to see the Raman cross-sections of each transition.
